# Supplementary material for: Aqueous chemistry and antiproliferative activity of a pyrone-based phosphoramidate Ru(arene) anticancer agent
Source: Royal Society of Chemistry journal article supplement (doi:10.1039/c4dt00569d), 2014-01-01
Supplement: c4dt00569d1.pdf [file c4dt00569d1.pdf]

## Supporting Information

# Aqueous Chemistry and Antiproliferative Activity of a Pyrone-based Phosphoramidate Ru(Arene) Anticancer Agent

*Samuel M. Meier,<sup>a,b</sup> Maria S. Novak,<sup>a</sup> Wolfgang Kandioller,<sup>a,b</sup> Michael A. Jakupec,<sup>a,b</sup> Alexander Roller,<sup>a</sup>  
Bernhard K. Keppler,<sup>a,b</sup> Christian G. Hartinger<sup>a-c\*</sup>*

<sup>a</sup> University of Vienna, Institute of Inorganic Chemistry, Waehringer Str. 42, A-1090 Vienna, Austria.

<sup>b</sup> University of Vienna, Research Platform “Translational Cancer Therapy Research”, Waehringer Str. 42, A-1090 Vienna, Austria.

<sup>c</sup> University of Auckland, School of Chemical Sciences, Private Bag 92019, 1142 Auckland, New Zealand.

### Table of contents

- S2. Experimental section including materials, instrumentation and methods
- S7. Synthesis of **1** and **1A**
- S9. Tables S1 and S2 give details on the X-ray diffraction and cell parameters
- S11. Tables S3 and S4 give experimental details on the detected ions in ESI-MS experiments
- S12. Figures S1–S3 give details on the reactions of **1A** with biological nucleophiles
- S15. Figure S4 and S5 shows the results of the annexin V assays.
- S17. References

## 1 **Experimental**

### 2 *Materials*

3 All reactions were carried out in dry solvents and under inert atmosphere. Chemicals obtained from  
4 commercial suppliers were used as received. Methanol and dichloromethane were dried using standard  
5 procedures. RuCl<sub>3</sub>·3H<sub>2</sub>O (40.4%) was purchased from Johnson Matthey; L-cysteine from Fluka; horse  
6 heart cytochrome c, dimethylsulfoxide (DMSO) and 9-ethylguanine and glycine from Sigma;  $\alpha$ -  
7 terpinene from Acros; L-histidine from Merck and sodium methoxide and triphenylphosphite from  
8 Sigma-Aldrich. Methanol (VWR Int., HiPerSolv CHROMANORM), formic acid (Fluka) and milliQ  
9 H<sub>2</sub>O (18.2 M $\Omega$ , Advantage A10, 185 UV Ultrapure Water System, Millipore, France) were used for  
10 ESI-MS experiments. The dimer bis[dichlorido( $\eta^6$ -p-cymene)ruthenium(II)]<sup>1,2</sup> and the ligand 2-  
11 (azidomethyl)-5-hydroxy-4*H*-pyran-4-one<sup>3</sup> were synthesized as previously described.

12

13

### 14 *Instrumentation*

15 NMR spectra were recorded at 25 °C on a Bruker FT NMR spectrometer Avance III<sup>TM</sup> 500 MHz at  
16 500.10 (<sup>1</sup>H), 202.63 MHz (<sup>31</sup>P{<sup>1</sup>H}) and 125.75 MHz (<sup>13</sup>C{<sup>1</sup>H}) and 2D NMR data were collected in a  
17 gradient-enhanced mode. Hydrogen and carbon atoms were numbered according to crystal structure  
18 numbering. Elemental analysis was carried out on a Perkin–Elmer 2400 CHN Elemental Analyzer by  
19 the Laboratory for Elemental Analysis, Faculty of Chemistry, University of Vienna. Electrospray  
20 ionization mass spectra were recorded on a Bruker AmaZon SL ion trap (IT) and on a UHR MaXis  
21 time-of-flight (TOF) mass spectrometer (Bruker Daltonics GmbH, Bremen, Germany). Data was  
22 acquired and processed using Compass 1.3 and Data Analysis 4.0 (Bruker Daltonics GmbH, Bremen,  
23 Germany). Deconvolution was obtained by applying the maximum entropy algorithm with a 0.1 *m/z*

1 mass step and 0.5  $m/z$  instrument peak width for the IT and automatic data point spacing and 30'000  
2 instrument resolving power for the TOF. X-ray diffraction measurements of single crystals were  
3 performed on a Bruker X8 APEX II CCD diffractometer at 100 K. The crystals were positioned at  
4 35 mm from the detector and 607 frames for 50 sec over  $1^\circ$  were measured. The data was processed  
5 using the SAINT Plus software package.<sup>4</sup> Crystal data, data collection parameters, and structure  
6 refinement details are given in Table S1. The structures were solved by direct methods and refined by  
7 full-matrix least-squares techniques. Non-hydrogen atoms were refined with anisotropic displacement  
8 parameters. Hydrogen atoms were inserted at calculated positions and refined with a riding model. The  
9 following software programs and tables were used: SHELXS-97,<sup>5</sup> SHELXL-97<sup>5</sup> and Mercury CSD 3.0.<sup>6</sup>

10

11

12 *Methods*

### 13 **Interaction with biomolecules**

14 Samples for ESI-MS experiments were analyzed by direct infusion at a flow rate of 3  $\mu\text{L}/\text{min}$  and at  
15 typical concentrations of 1–5  $\mu\text{M}$ . Protein samples were analyzed under denaturing conditions by  
16 diluting with water : methanol : formic acid (50 : 50 : 0.2), while the reference complexes and small  
17 molecule samples were diluted with water : methanol (50 : 50). Stock solutions of compound **1A** were  
18 prepared in  $\text{H}_2\text{O}$  containing 1% DMSO. The following molar ratios were used for interaction studies at  
19 37  $^\circ\text{C}$  and pH 5.5: cyt : **1A** (1 : 3), amino acid : **1A** (1 : 1) and EtG : **1A** (2 : 1). Mass spectra were  
20 recorded after 0, 1, 3, 6, 24 and 48 h. In general, relative intensities correspond to percentages of the  
21 area under peaks of the sum of all assignable ruthenium signals in the spectrum.

22

23

## 1 **Cell lines and culture conditions**

2 CH1 (human ovarian adenocarcinoma) cells were provided by Lloyd R. Kelland (CRC Centre for  
3 Cancer Therapeutics, Institute of Cancer Research, Sutton, UK). SW480 (human adenocarcinoma of the  
4 colon) and A549 (human non-small cell lung cancer) cells were provided by Brigitte Marian, and HL-60  
5 (human promyelocytic leukemia) cells by Walter Berger (both Institute of Cancer Research, Department  
6 of Medicine I, Medical University of Vienna, Austria). All cell culture reagents were purchased from  
7 Sigma-Aldrich Austria and plastic ware from Starlab Germany. Cells were grown in 75 cm<sup>2</sup> culture  
8 flasks as adherent monolayer cultures in Minimum Essential Medium (MEM) supplemented with 10%  
9 heat-inactivated fetal calf serum, 1 mM sodium pyruvate, 4 mM L-glutamine and 1% non-essential  
10 amino acids (from 100× ready-to-use stock). Cultures were maintained at 37 °C in a humidified  
11 atmosphere containing 95% air and 5% CO<sub>2</sub>.

## 13 **Cytotoxicity tests**

14 Cytotoxicity was determined by the colorimetric MTT (3-(4,5-dimethyl-2-thiazolyl)-2,5-diphenyl-2*H*-  
15 tetrazolium bromide) microculture assay. For this purpose, cells were harvested from culture flasks by  
16 trypsinization and seeded in 100 µL/well aliquots of complete MEM into 96-well microculture plates.  
17 Cell densities of  $1.0 \times 10^3$  cells per well (CH1),  $2.0 \times 10^3$  cells per well (SW480) and  $3.0 \times 10^3$  cells per  
18 well (A549) were chosen in order to ensure exponential growth of untreated controls throughout the  
19 experiment. Cells were allowed to settle and resume exponential growth for 24 h. The test compound  
20 was dissolved in DMSO, then serially diluted in MEM and added to the plates (100 µL/well) where the  
21 final DMSO content did not exceed 0.5% (v/v). Compound **1A** displayed a solubility of *ca.* 0.5 mM in  
22 MEM containing 1% DMSO. After 96 h exposure, the medium was replaced with 100 µL per well of a  
23 1:7 MTT/RPMI 1640 solution (MTT solution, 5 mg/mL of MTT reagent in phosphate-buffered saline;  
24 RPMI 1640 medium, supplemented with 10% heat-inactivated fetal bovine serum and 4 mM L-

1 glutamine). After incubation for 4 h, the MTT/RPMI 1640 solution was removed, and the formazan  
2 product formed by viable cells was dissolved in 150  $\mu$ L DMSO per well. Optical densities at 550 nm  
3 were measured with a microplate reader (BioTek ELx808), by using a reference wavelength of 690 nm  
4 to correct for unspecific absorption. The quantity of viable cells was expressed in terms of T/C values  
5 by comparison to untreated control microcultures, and 50% inhibitory concentrations ( $IC_{50}$ ) were  
6 calculated from concentration-effect curves by interpolation. Evaluation is based on means from three  
7 independent experiments, each comprising three replicates per concentration level.

8

9 **Flow cytometric detection of apoptotic cells**

10 Induction of cell death was analyzed by fluorescence-activated cell sorting (FACS) using FITC-  
11 conjugated annexin V (BioVision, USA) and propidium iodide (PI; Fluka) double staining. HL-60 cells  
12 were seeded into 12-well plates (Starlab) in a density of  $5 \times 10^4$  cells per well in complete medium (as  
13 described above) and allowed to settle for 24 h. The cells were exposed to the test compound in different  
14 concentrations for 48 h at 37 °C. Staurosporine (Sigma-Aldrich Austria) was used as a positive control.  
15 After the incubation, cells were gently trypsinized, washed with PBS, and suspended with FITC-  
16 conjugated annexin V (0.25  $\mu$ g/mL) and PI (1  $\mu$ g/mL) in binding buffer (10 mM HEPES/NaOH pH 7.4,  
17 140 mM NaCl, 2.5 mM  $CaCl_2$ ) at 37 °C for 15 min. Stained cells were analysed with a Guava 8HT  
18 EasyCyte Flow cytometer (Merck Millipore, Guava, USA) using InCyte software. Three independent  
19 experiments were conducted, and 5000 cells per analysis were measured.

20

21 **Western blot detection of PARP cleavage**

22 The cleavage of the apoptosis-associated protein PARP was detected in CH1 cells. Cells were seeded  
23 in densities of  $2 \times 10^5$  cells per well into 6-well plates (Starlab) and allowed to resume proliferation for  
24 24 h. The cells were exposed to the test compound and staurosporine (positive control) in different

1 concentrations for 24 h at 37 °C. After the treatment the cells were washed with PBS and lysed by  
2 adding 100 µL per well of RIPA lysis buffer (150 mM sodium chloride, 1.0% Triton X-100, 0.5%  
3 sodium deoxycholate, 0.1% SDS (sodium dodecyl sulphate), 50 mM Tris, pH 8.0). Cells were carefully  
4 scratched and sonicated for 10 sec to shear DNA and reduce sample viscosity. The protein content of  
5 lysates was measured with Pierce Micro BCA Protein Assay (Thermo Scientific). The appropriate  
6 volume of cell lysates (20 µg protein content per gel pocket) was mixed with 6× loading buffer (12%  
7 w/v SDS, 30% 2-mercaptoethanol, 60% glycerol, 0.012% bromophenol blue, 0.375 M Tris HCL, pH  
8 6.8) and heated at 95° C for 5 min. The proteins were separated by 8% SDS-polyacrylamide gel  
9 electrophoresis and subsequently transferred onto nitrocellulose membranes (Millipore) by using a semi-  
10 dry blotting apparatus (Biorad). The membranes were blocked with blocking buffer (1× TBS, 0.1%  
11 Tween-20 with 5% BSA) and immunoblotted with the relevant primary PARP rabbit antibody diluted in  
12 TBS/T buffer in a ratio of 1:1000 (Cell Signaling Technology). Primary antibodies were detected by  
13 using anti-rabbit IgG HRP-linked antibody diluted in TBS/T buffer in a ratio of 1:3000 (Cell Signaling  
14 Technology) and visualized with a chemiluminescence detection system Fusion SL (Vilber Lourmat)  
15 using SuperSignal West Pico Chemiluminescent Substrate (Thermo Scientific). Afterwards the  
16 membranes were cleaned by stripping buffer (15 g glycine, 1 g SDS, 10 mL Tween 20, pH 2.2) and  
17 immunoblotted with the β-actin rabbit antibody diluted in TBS/T buffer in a ratio of 1:3000 (Cell  
18 Signaling Technology) to check the quality of gel loading procedure. Results are based on three  
19 independent experiments.

20

## 1 Synthesis

2

3 **Diphenyl{(5-hydroxy-4-oxo-4*H*-pyran-2-yl)methyl}phosphoramidate (1).** 2-(Azidomethyl)-5-  
4 hydroxy-4*H*-pyran-4-one (200 mg, 1.2 mmol) was suspended in dry DCM (3 mL) under argon  
5 atmosphere and triphenylphosphite (627  $\mu$ L, 4.8 mmol) was slowly added. The reaction mixture was  
6 stirred for 24 h at room temperature. Diethyl ether was added and the formed colorless crystals were  
7 separated by filtration and dried *in vacuo*. Yield: 216 mg (77%). MS (ESI<sup>+</sup>):  $m/z$  374.04 [**1** + H<sup>+</sup>]<sup>+</sup> ( $m_{\text{ex}}$  =  
8 374.08). <sup>1</sup>H NMR (500.10 MHz, *d*<sub>6</sub>-DMSO):  $\delta$  = 9.05 (s, 1H, -OH), 7.91 (s, 1H, H-6), 7.39 (dd, <sup>3</sup>*J*(H,H)  
9 = 7 Hz, <sup>3</sup>*J*(H,H) = 7 Hz, 4H, H<sub>Ar 3',5'</sub>), 7.23–7.19 (m, 6H, H<sub>Ar 2',4',6'</sub>), 6.57 (dt, <sup>2</sup>*J*(P,H) = 14 Hz, <sup>3</sup>*J*(H,H) =  
10 7 Hz, 1H, -NH), 6.26 (s, 1H, H-3), 4.01 (dd, <sup>3</sup>*J*(P,H) = 14 Hz, <sup>3</sup>*J*(H,H) = 7 Hz, 2H, H-7) ppm. <sup>13</sup>C{<sup>1</sup>H}  
11 NMR (125.75 MHz, *d*<sub>6</sub>-DMSO):  $\delta$  = 174.2 (C-4), 165.7 (C-2), 150.9 (C<sub>Ar 1'</sub>), 146.2 (C-5), 139.8 (C-6),  
12 130.3 (C<sub>Ar 3';5'</sub>), 125.4 (C<sub>Ar 4'</sub>), 120.6 (C<sub>Ar 2';6'</sub>), 111.5 (C-3), 42.5 (C-7) ppm. <sup>31</sup>P{<sup>1</sup>H} NMR (202.63  
13 MHz, *d*<sub>6</sub>-DMSO):  $\delta$  = -0.02 ppm.

14 **[Chlorido( $\eta^6$ -*p*-cymene){5-oxo- $\kappa$ O-2-[(diphenylphosphoramido)methyl]-4*H*-pyronato-**  
15  **$\kappa$ O}ruthenium(II)] (1A).** Ligand **1** (201 mg, 0.54 mmol) and sodium methoxide (32 mg, 0.59 mmol)  
16 were suspended in dry methanol under argon atmosphere at room temperature for 15 min.  
17 Bis[dichlorido( $\eta^6$ -*p*-cymene)ruthenium(II)] (149 mg, 0.25 mmol) in methanol (10 mL) was added and  
18 the clear, orange colored reaction mixture was stirred for further 18 h. The solvent was removed under  
19 reduced pressure. The residue was dissolved in dichloromethane, filtered and the filtrate was  
20 concentrated to a final volume of ca. 2–3 mL. The product was precipitated by addition of *n*-hexane,  
21 filtered and dried *in vacuo*. The product **1A** was isolated as brownish crystals. Yield: 125 mg (40%).  
22 Elemental analysis calculated for C<sub>28</sub>H<sub>29</sub>ClNO<sub>6</sub>PRu·0.3CH<sub>2</sub>Cl<sub>2</sub>: C, 50.84; H, 4.46; N, 2.10; O, 4.63;  
23 found: C, 50.84; H, 4.44; N, 2.18; O, 4.71. MS (ESI<sup>+</sup>):  $m/z$  608.0745 [**1A** - Cl]<sup>+</sup> ( $m_{\text{ex}}$  = 608.0778,  
24 5 ppm). <sup>1</sup>H NMR (500.10 MHz, *d*<sub>6</sub>-DMSO):  $\delta$  = 7.72 (s, 1H, H-6), 7.40 (dd, <sup>3</sup>*J*(H,H) = 7 Hz, <sup>3</sup>*J*(H,H) =

1 7 Hz, 4H,  $H_{Ar\ 3',5'}$ ), 7.24–7.19 (m, 6H,  $H_{Ar\ 2',4',6'}$ ), 6.56 (dt,  $^2J(P,H) = 14$  Hz,  $^3J(H,H) = 7$  Hz, 1H,  $-\underline{NH}$ ),  
2 6.47 (s, 1H, H-3), 5.69–5.66 (m, 2H,  $H_{Cym\ 3',5'}$ ), 5.41–5.39 (m, 2H,  $H_{Cym\ 2',6'}$ ), 4.03 (dd,  $^3J(P,H) = 14.5$   
3 Hz,  $^3J(H,H) = 7$  Hz, 2H, H-7), 2.76 (sept,  $^3J(H,H) = 7$  Hz, 1H,  $H_{Cym\ b}$ ), 2.15 (s, 3H,  $H_{Cym\ a}$ ), 1.25 (d,  
4  $^3J(H,H) = 7$  Hz, 6H,  $H_{Cym\ c}$ ) ppm.  $^{13}C\{^1H\}$  NMR (125.75 MHz,  $d_6$ -DMSO):  $\delta = 185.1$  (C-4), 165.1 (C-  
5 2), 159.5 (C-5), 150.2 ( $C_{Ar\ 1'}$ ), 139.9 (C-6), 129.8 ( $C_{Ar\ 3',5'}$ ), 124.8 ( $C_{Ar\ 4'}$ ), 120.0 ( $C_{Ar\ 2',6'}$ ), 107.5 (C-3),  
6 97.9 ( $C_{Cym\ 1'}$ ), 94.8 ( $C_{Cym\ 4'}$ ), 79.8 ( $C_{Cym\ 3',5'}$ ), 76.9 ( $C_{Cym\ 2',6'}$ ), 41.9 (C-7), 30.5 ( $C_{Cym\ b}$ ), 21.9 ( $C_{Cym\ c}$ ),  
7 17.9 ( $C_{Cym\ a}$ ) ppm.  $^{31}P\{^1H\}$  NMR (202.63 MHz,  $d_6$ -DMSO):  $\delta = -0.11$  ppm.

8

9



1 **Table S1.** Details on X-ray diffraction measurements and associated crystal cell parameters of **1A**.

| <b>compound</b>                            | <b>1A</b>                                             |
|--------------------------------------------|-------------------------------------------------------|
| CCDC N°                                    | 902336                                                |
| chemical formula                           | C <sub>28</sub> H <sub>29</sub> NO <sub>6</sub> PClRu |
| <i>M</i> (g mol <sup>-1</sup> )            | 643.03                                                |
| temperature (K)                            | 100(2)                                                |
| crystal size (mm)                          | 0.02 × 0.12 × 0.30                                    |
| crystal color, habit                       | red, block                                            |
| crystal system                             | monoclinic                                            |
| space group                                | P2 <sub>1</sub> /c                                    |
| <i>a</i> (Å)                               | 15.998(3)                                             |
| <i>b</i> (Å)                               | 16.226(4)                                             |
| <i>c</i> (Å)                               | 10.5737(18)                                           |
| <i>V</i> (Å <sup>3</sup> )                 | 2647.92                                               |
| <i>α</i> (deg)                             | 90.00                                                 |
| <i>β</i> (deg)                             | 105.258(6)                                            |
| <i>γ</i> (deg)                             | 90.00                                                 |
| <i>Z</i>                                   | 4                                                     |
| <i>D<sub>c</sub></i> (g cm <sup>-3</sup> ) | 1.61                                                  |
| <i>μ</i> (mm <sup>-1</sup> )               | 0.80                                                  |
| F(000)                                     | 1312.0                                                |
| Θ range (deg)                              | 2.36–25.35                                            |
| <i>h</i> range                             | -19/19                                                |
| <i>k</i> range                             | -18/19                                                |
| <i>l</i> range                             | -12/12                                                |
| no. unique refls.                          | 4760                                                  |
| no. parameters                             | 344                                                   |
| <i>R</i> <sub>int</sub>                    | 0.1618                                                |
| <i>R</i> <sub>1</sub> (obs.)               | 0.0783                                                |
| <i>wR</i> <sub>2</sub> (all data)          | 0.1316                                                |
| <i>S</i>                                   | 1.079                                                 |

2

1 **Table S2.** Selected bond lengths (Å), angles (°) and torsion angles (°) of **1A**.

| <b>Bond Length (Å)</b>       | <b>1A</b>  |
|------------------------------|------------|
| Ru–Cl                        | 2.4371(18) |
| Ru–O2                        | 2.104(4)   |
| Ru–O3                        | 2.112(5)   |
| Ru–centroid                  | 1.654(7)   |
| C6–O2                        | 1.323(8)   |
| C5–O3                        | 1.277(8)   |
| N1–P1                        | 1.616(6)   |
| <b>Bond Angles (°)</b>       |            |
| O2–Ru–O3                     | 78.33(18)  |
| O2–Ru–Cl                     | 83.66(13)  |
| O3–Ru–Cl                     | 84.09(13)  |
| <b>Torsion Angle (°)</b>     |            |
| Ru–O3–C4–C5                  | -8.3(7)    |
| C <sub>Cym4'</sub> –Ru–O3–C4 | -158.8(4)  |
| C3–C2–C7–N1                  | 89.2(8)    |

2

3

1 **Table S3.** The experimental and theoretical values of the assigned mass signals in the ESI-IT and –TOF  
 2 MS experiments. Experimental values on the IT instruments include a standard deviation of  $m/z \pm 0.03$ ,  
 3 except where noted.  $\mathbf{1A}_{\text{hydr}} = [\mathbf{1A} - \text{Cl}]^+$ .

| <b>IT MS</b>                                         |                                               |                                               |
|------------------------------------------------------|-----------------------------------------------|-----------------------------------------------|
| <b>Detected Ion</b>                                  | <b><math>m/z</math></b>                       | <b><math>\mathbf{m}_{\text{theor}}</math></b> |
| $[\mathbf{1} + \text{H}]^+$                          | 374.04                                        | 374.08                                        |
| $\mathbf{1A}_{\text{hydr}}^+$                        | 607.98                                        | 608.08                                        |
| $[\text{Ru}(\text{cym})(\text{Gly}) - \text{H}]^+$   | 309.92                                        | 310.04                                        |
| $[\text{Ru}(\text{cym})(\text{Gly})_2 - \text{H}]^+$ | 387.90                                        | 388.09                                        |
| $[\text{Ru}(\text{cym})(\text{His}) - \text{H}]^+$   | 389.96                                        | 390.08                                        |
| $[\mathbf{1A}_{\text{hydr}} + \text{His}]^+$         | 762                                           | 762.14                                        |
| $[\text{Ru}(\text{cym})(\text{Cys}) - \text{H}]^+$   | 355.90                                        | 356.03                                        |
| $[\mathbf{1A}_{\text{hydr}} + \text{EtG}]^+$         | 786.98                                        | 787.16                                        |
| <b>Deconvoluted Ion</b>                              |                                               |                                               |
| <b><math>m/z</math></b>                              | <b><math>\mathbf{m}_{\text{theor}}</math></b> |                                               |
| $\text{cyt}^+$                                       | $12356.7 \pm 0.6$                             | 12358.3                                       |
| $[\text{cyt} + \text{Ru}(\text{cym}) - \text{H}]^+$  | $12591.4 \pm 1.2$                             | 12593.4                                       |
| <b>TOF MS</b>                                        |                                               |                                               |
| <b>Deconvoluted Ion</b>                              | <b><math>m_{\text{acc}}</math></b>            | <b><math>\mathbf{m}_{\text{ex}}</math></b>    |
| $\text{cyt}^+$                                       | 12358.24                                      | 12358.35                                      |
| $[\text{cyt} + \text{Ru}(\text{cym}) - \text{H}]^+$  | 12592.23                                      | 12592.33                                      |
| $[\text{cyt} + \mathbf{1A}_{\text{hydr}}]^+$         | 12967.30                                      | 12967.43                                      |

4

5

1 **Table S4.** The table shows the relative intensity of each deconvoluted ion (%) of the reaction between  
2 **1A** and cyt after 48 h. Note that the extent of metallation is similar, but the nature of the adducts differs.

|        | cyt <sup>+</sup> | [cyt + Ru(cym)] <sup>+</sup> | [cyt + <b>1A</b> <sub>hydr</sub> ] <sup>+</sup> |
|--------|------------------|------------------------------|-------------------------------------------------|
| IT MS  | 61               | 39                           | -                                               |
| TOF MS | 61               | 24                           | 15                                              |

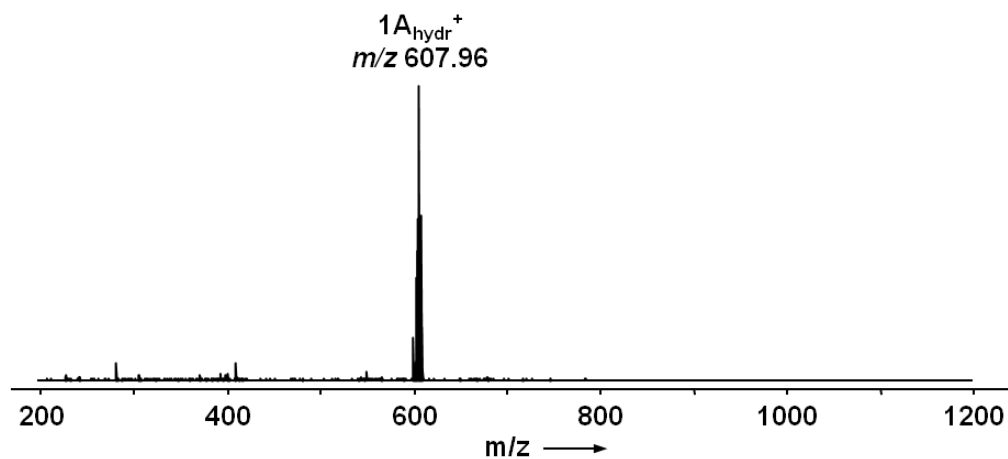

7  
8 **Figure S1.** The ESI-IT mass spectrum of **1A** in aqueous solution recorded after 48 h shows that the  
9 organometallic compound is stable under these conditions (**1A**<sub>hydr</sub> = [**1A** - Cl]<sup>+</sup>).

10  
11

1

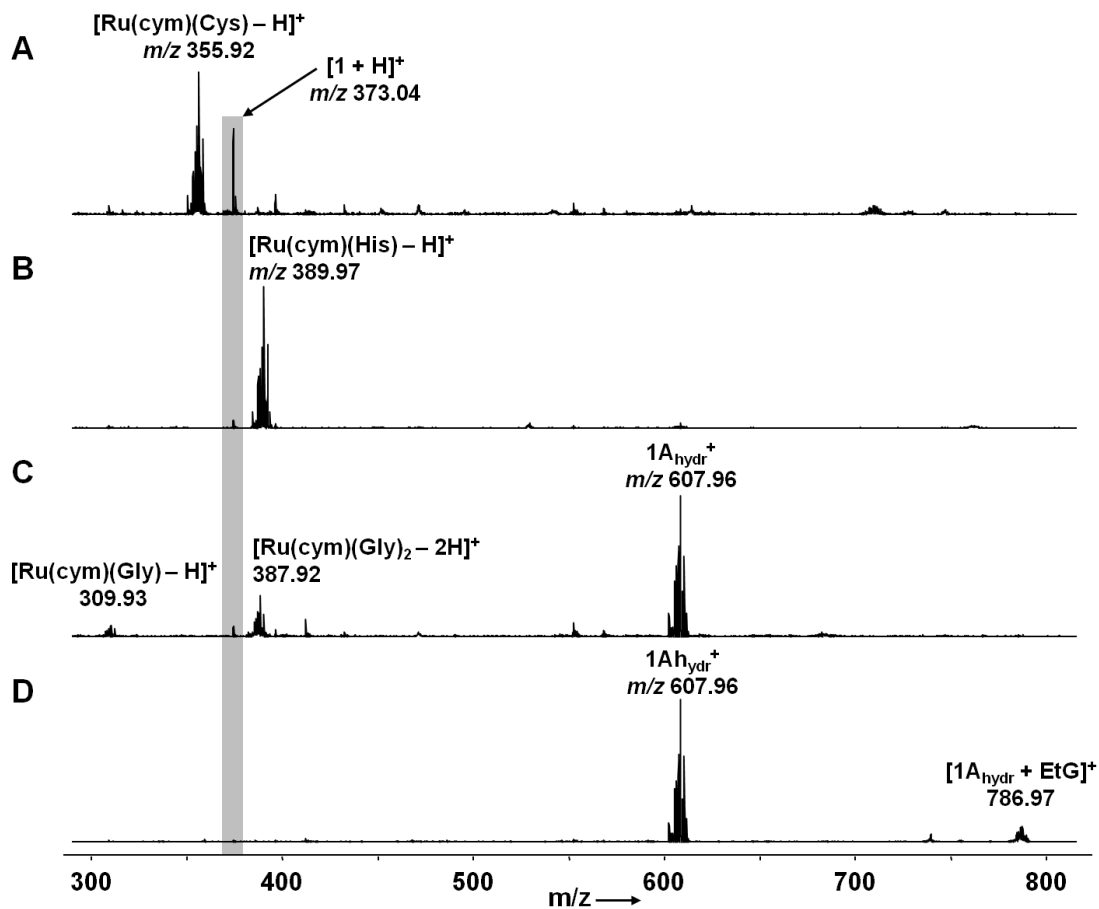

2

3 **Figure S2.** The ESI-IT mass spectra of the incubations of **1A** with L-cysteine (Cys, **A**), L-histidine (His,  
 4 **B**), glycine (Gly, **C**) and 9-ethylguanine (EtG, **D**). The metal-to-biomolecule ratios were 1 : 1 and 1 : 2  
 5 for the amino acids and EtG, respectively. The mass spectra in **A** and **B** were recorded after 6 h and the  
 6 spectra **C** and **D** after 48 h ( $1\text{A}_{\text{hydr}} = [\text{1A} - \text{Cl}]^+$ ).

7

1

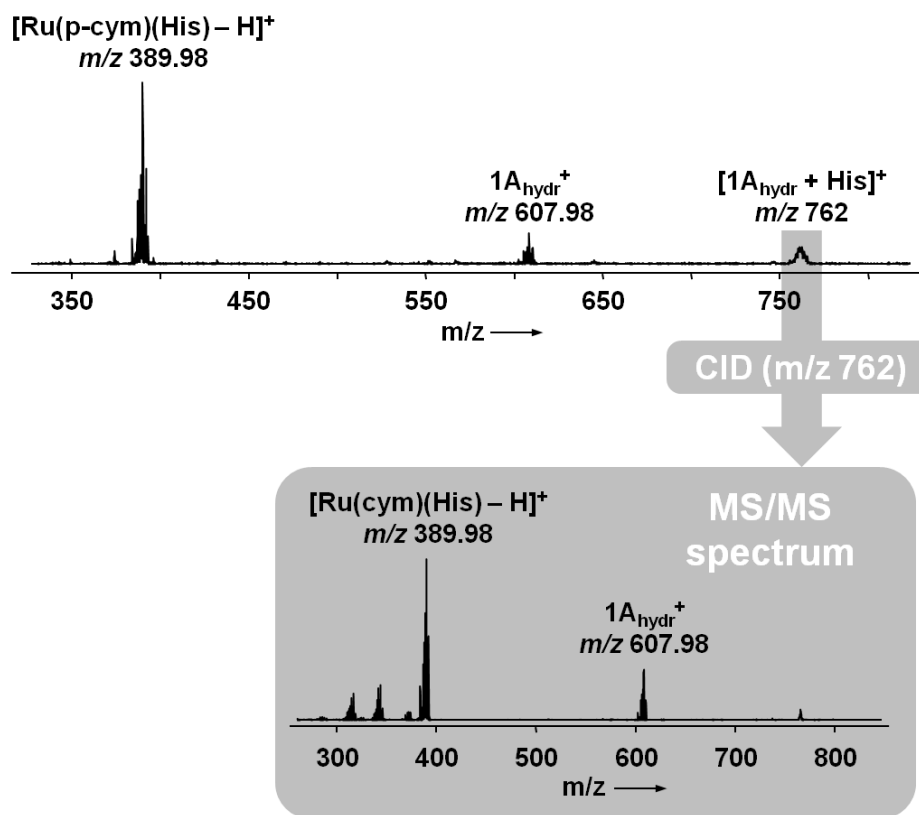

2

3 **Figure S3.** The ESI-IT mass spectrum of the reaction between **1A** and L-histidine (His) is shown after 3 h. The  
 4 broad signal at  $m/z$  762 indicates a mono-dentate approach of His to the free coordination site of the hydrolyzed  
 5 **1A** prior to pyronato ligand cleavage. The MS/MS spectrum underlines His coordination to the metal ( $1\text{A}_{\text{hydr}} =$   
 6  $[1\text{A} - \text{Cl}]^+$ ).

7

1

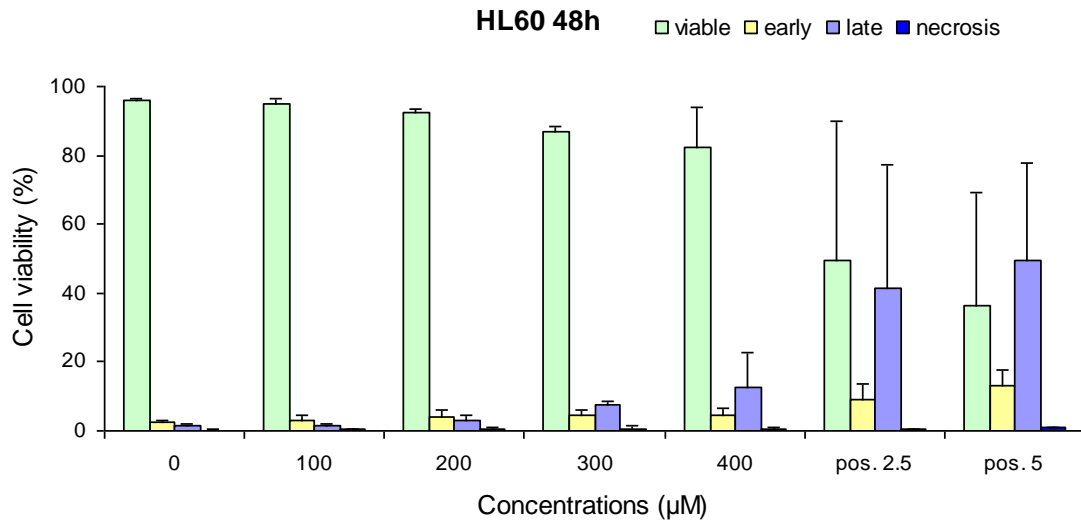

2

3 **Figure S4.** Apoptosis/necrosis induction in HL-60 cells after 48 h exposure to compound **1A**, measured  
4 by FACS using annexin V-FITC/propidium iodide double staining. The positive control (pos.) was  
5 treated with stauporine at concentrations of 2.5 and 5  $\mu\text{M}$ .

6

1

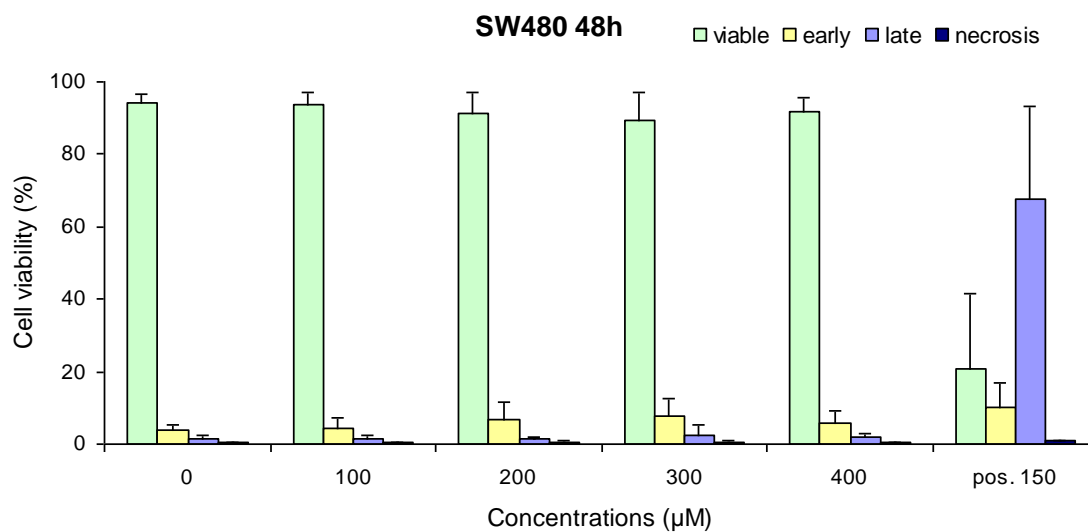

2

3 **Figure S5.** Apoptosis/necrosis induction in SW480 cells after 48 h exposure to compound **1A**, measured  
4 by FACS using annexin V-FITC/propidium iodide double staining. The positive control (pos.) was  
5 treated with the platinum(II)-oxime complex KP1988<sup>7</sup> at a concentration of 150 μM.

6



1 **References**

2

3 1. M. A. Bennett and A. K. Smith, *J. Chem. Soc., Dalton Trans.*, 1974, 233-241.

4 2. M. A. Bennett, T. N. Huang, T. W. Matheson and A. K. Smith, *Inorg. Synth.*, 1982, **21**, 74-78.

5 3. S. M. Meier, M. Novak, W. Kandioller, M. A. Jakupec, V. B. Arion, B. K. Keppler and C. G.  
6 Hartinger, *Chem. Eur. J.*, 2013, **19**, 9297-9307.

7 4. *SAINT + Integration Engine, Program for Crystal Structure Integration*, Bruker Analytical X-  
8 ray systems, Madison, 2004.

9 5. *SHELXL-97, Program for Crystal Structure Refinement:*, University Göttingen (Germany),  
10 1997.

11 6. C. F. Macrae, I. J. Bruno, J. A. Chisholm, P. R. Edgington, P. McCabe, E. Pidcock, L.

12 Rodriguez-Monge, R. Taylor, J. van de Streek and P. A. Wood, *J. Appl. Crystallogr.*, 2008, **41**,  
13 466-470.

14 7. Y. Y. Scaffidi-Domianello, A. A. Legin, M. A. Jakupec, A. Roller, V. Y. Kukushkin, M.

15 Galanski and B. K. Keppler, *Inorg. Chem.*, 2012, **51**, 7153-7163.

16

17
